# Supplementary material for: Structural, Functional and Phylogenetic Analysis of Sperm Lysozyme-Like Proteins
Source: PLOS journal article supplement (doi:10.1371/journal.pone.0166321), 2016-11-10
Supplement: S1 (10.1371/journal.pone.0166321.s001) [file journal.pone.0166321.s001]

**S1 Table. Species wise list of lysozyme-like proteins taken in the present study.**

|                 | Species          | LYZL1/<br>LYZL2 | SLLP1 | LYZL4 | LYZL5 | LYZL6 |
|-----------------|------------------|-----------------|-------|-------|-------|-------|
| <b>Mammals</b>  |                  |                 |       |       |       |       |
| Primates        | Human            | ●               | ●     | ●     | ●     | ●     |
|                 | Chimpanzee       | ●               | ●     | ●     | ●     | ●     |
|                 | Orangutan        | ●               | ●     | ∅     | ●     | ●     |
|                 | Gorilla          | ●               | ●     | ●     | ●     | ●     |
|                 | Baboon           | ●               | ●     | ●     | ●     | ●     |
|                 | Monkey           | ●               | ●     | ●     | ●     | ●     |
|                 | Gibbon           | ●               | ●     | ●     | ●     | ●     |
|                 | Marmoset         | ●               | ●     | ●     | ●     | ●     |
|                 | Bushbaby         | ●               | ●     | ●     | ●     | ●     |
| Monotremata     | Platypus         | ●               | ●     | ●     | ∅     | ●     |
| Rodentia        | Mouse            | ●               | ●     | ●     | ●     | ●     |
|                 | Rat              | ●               | ●     | ●     | ●     | ●     |
|                 | Guinea pig       | ●               | ●     | ●     | ●     | ●     |
|                 | Squirrel         | ●               | ∅     | ●     | ●     | ●     |
|                 | Mole             | ●               | ●     | ∅     | ●     | ●     |
|                 | Chinese hamster  | ●               | ●     | ●     | ●     | ●     |
| Artiodactyla    | Buffalo          | ●               | ●     | ●     | ●     | ●     |
|                 | Cattle           | ●               | ●     | ●     | ●     | ●     |
|                 | Goat             | ●               | ●     | ●     | ●     | ●     |
|                 | Sheep            | ●               | ●     | ●     | ●     | ●     |
|                 | Camel            | ●               | ●     | ●     | ●     | ●     |
|                 | Pig              | ●               | ●     | ●     | ●     | ●     |
| Carnivora       | Cat              | ●               | ●     | ●     | ●     |       |
|                 | Dog              | ●               | ●     | ●     | ●     | ●     |
|                 | Mustela          |                 | ●     | ●     | ●     | ●     |
|                 | Giant panda      | ●               | ●     | ●     | ●     | ∅     |
| Lagomorpha      | American pika    | ●               | ●     | ●     |       | ●     |
|                 | Rabbit           | ●               | ●     | ●     | ●     | ●     |
| Proboscidea     | Elephant         |                 | ●     | ●     | ●     | ●     |
| Cingulata       | Armadillo        | ●               | ●     | ●     | ●     |       |
| Chiroptera      | Little brown bat |                 | ●     | ●     | ●     | ●     |
|                 | Flying fox       | ●               | ●     | ●     | ●     | ●     |
| Eulipotyphla    | European shrew   |                 | ●     | ●     | ●     | ●     |
| Perrisodactyla  | Horse            | ●               | ●     | ●     | ∅     | ●     |
| <b>Reptiles</b> |                  |                 |       |       |       |       |
| Squamata        | Python           |                 | ●     |       |       |       |

|                 |                  |  |   |  |   |  |
|-----------------|------------------|--|---|--|---|--|
|                 | King cobra       |  | • |  |   |  |
|                 | Garter snake     |  | • |  |   |  |
|                 | Green anole      |  | • |  |   |  |
| Crocodylia      | Alligator        |  | • |  |   |  |
| Testudines      | Green sea turtle |  | • |  |   |  |
| <b>Amphibia</b> |                  |  |   |  |   |  |
| Anura           | Frog             |  |   |  | • |  |

∅ Incomplete sequence
